# Supplementary material for: MicroRNA signatures in hereditary breast cancer
Source: Springer Nature journal article supplement (doi:10.1007/s10549-013-2723-7), 2013-10-15
Supplement: MOESM1 [file 10549_2013_2723_MOESM1_ESM.pdf]

## **SUPPLEMENTARY MATERIAL**

### **Breast Cancer Research and Treatment**

#### **MicroRNA signatures in hereditary breast cancer**

Rosa Murria-Estal<sup>1</sup>, Sarai Palanca Suela<sup>1</sup>, Inmaculada de Juan Jiménez<sup>1</sup>, Cecilia Egoavil Rojas<sup>2</sup>, Zaida García-Casado<sup>3</sup>, María José Juan Fita<sup>4</sup>, Ana Beatriz Sánchez Heras<sup>5</sup>, Ángel Segura Huerta<sup>6</sup>, Isabel Chirivella González<sup>7</sup>, Dolors Sánchez-Izquierdo<sup>8</sup>, Marta Llop García<sup>1</sup>, Eva Barragán González<sup>1</sup>, Pascual Bolufer Gilabert<sup>1</sup>.

<sup>1</sup>Laboratory of Molecular Biology, Service of Clinical Analysis. University Hospital La Fe, Valencia, Spain

<sup>2</sup>Department of Pathology, University General Hospital, Alicante, Spain

<sup>3</sup>Laboratory of Molecular Biology, IVO, Valencia, Spain

<sup>4</sup>Department of oncology, IVO, Valencia, Spain

<sup>5</sup>Genetic Counseling Unit, Elche Hospital, Alicante, Spain

<sup>6</sup>Genetic Counseling Unit, University Hospital La Fe, Valencia, Spain

<sup>7</sup>Genetic Counseling Unit, Clinic University Hospital, Valencia, Spain

<sup>8</sup>Arrays Service, Health Research Institute La Fe, Valencia, Spain

#### **Correspondence to**

Pascual Bolufer Gilabert,  
Laboratory of Molecular Biology, University Hospital La Fe,  
Escuela de Enfermería 7ª planta. Avd. Campanar 21, 46009 Valencia (Spain)  
TLF/FAX numbers: 34 961973351  
Email address: bolufer\_pas@gva.es

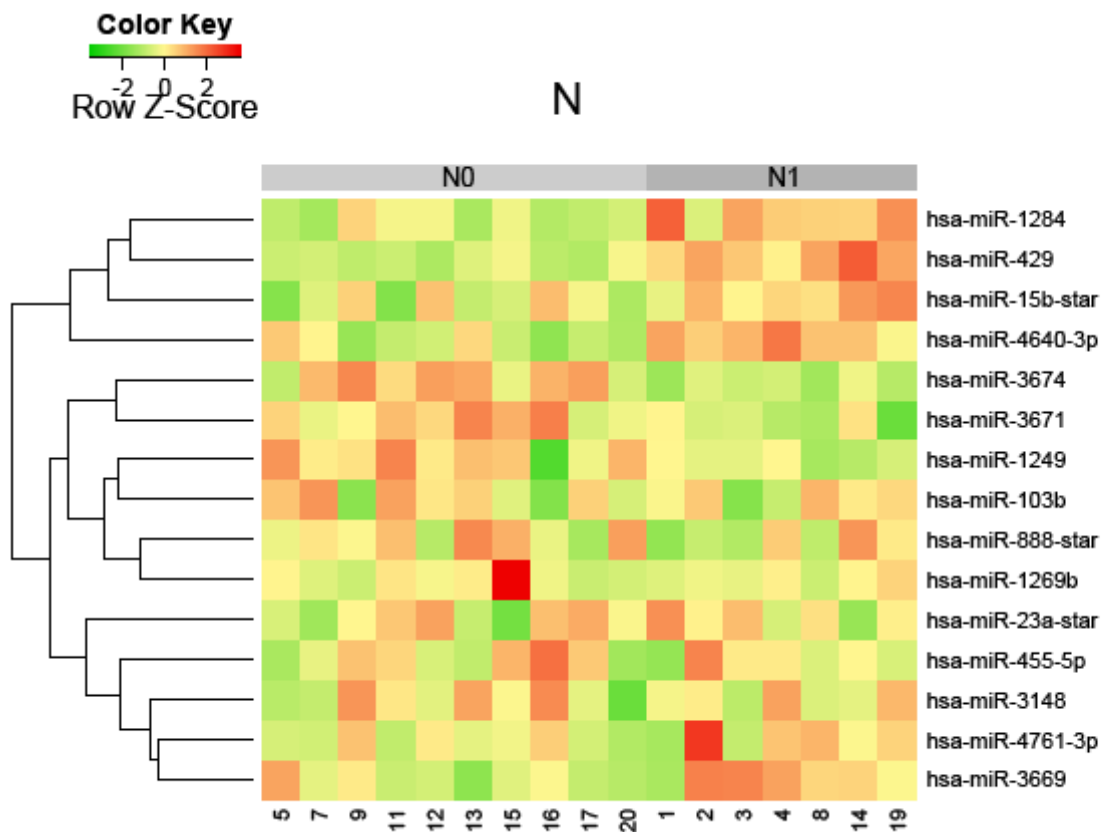

**Online Resource 1: Cluster analysis Node involvement (N0/N1).**

N0: lymph nodes not affected; N1: level1 lymph nodes; Numbers at the base of the image correspond to the identification of patients: 1-5 *BRCA1* mutation carrier; 6-10 *BRCA2* mutation carrier; 11-15 BRCAX; 16-20 SBC.

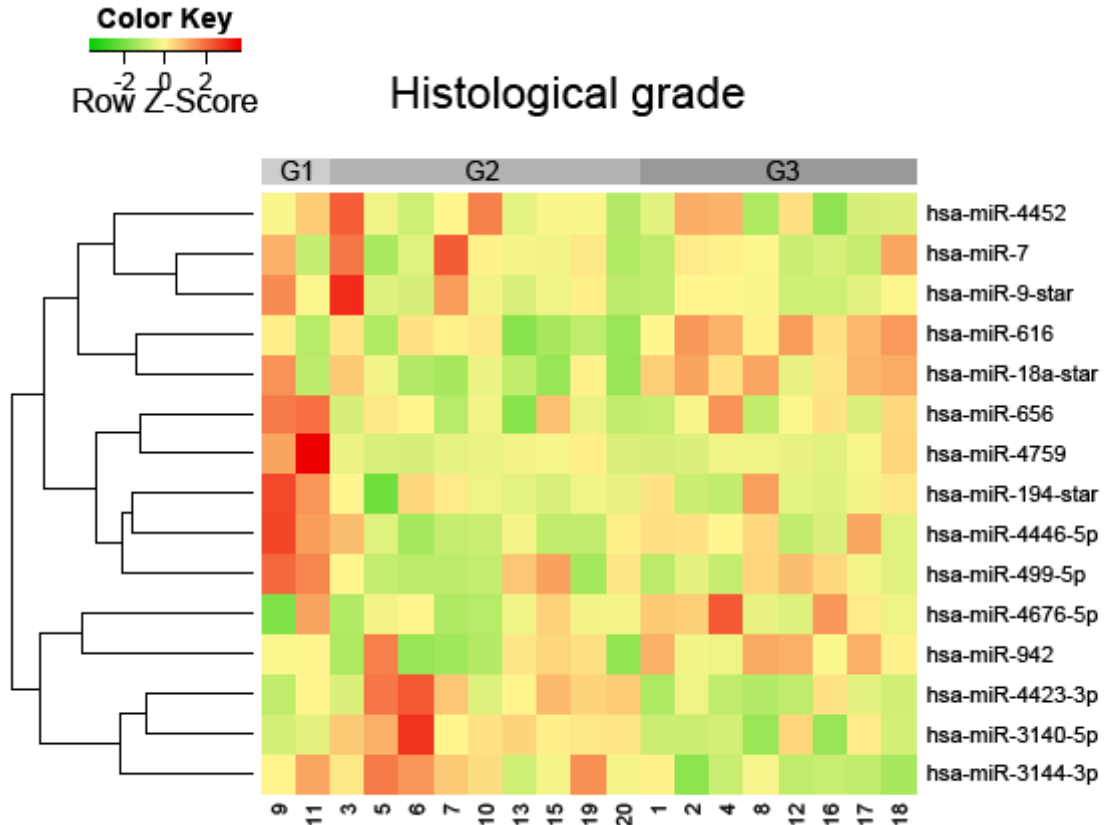

**Online Resource 2: Cluster analysis Histological grade (G1/G2/G3)**

G1: Grade 1; G2: Grade 2; G3: Grade 3. Numbers at the base of the image correspond to the identification of patients: 1-5 *BRCA1* mutation carrier; 6-10 *BRCA2* mutation carrier; 11-15 BRCAX; 16-20 SBC.

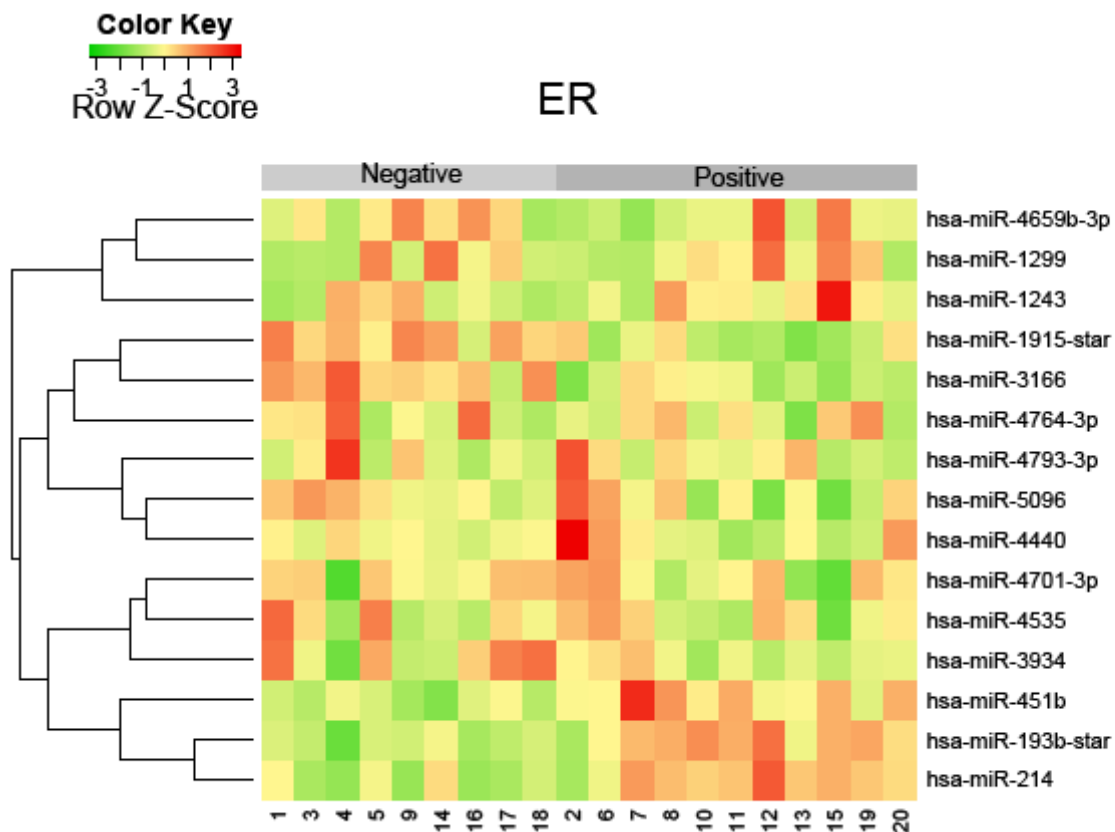

**Online Resource 3: Cluster analysis Estrogens Receptors (ER Negative/Positive) expression.**

Numbers at the base of the image correspond to the identification of patients: 1-5 *BRCA1* mutation carrier; 6-10 *BRCA2* mutation carrier; 11-15 BRCAX; 16-20 SBC.

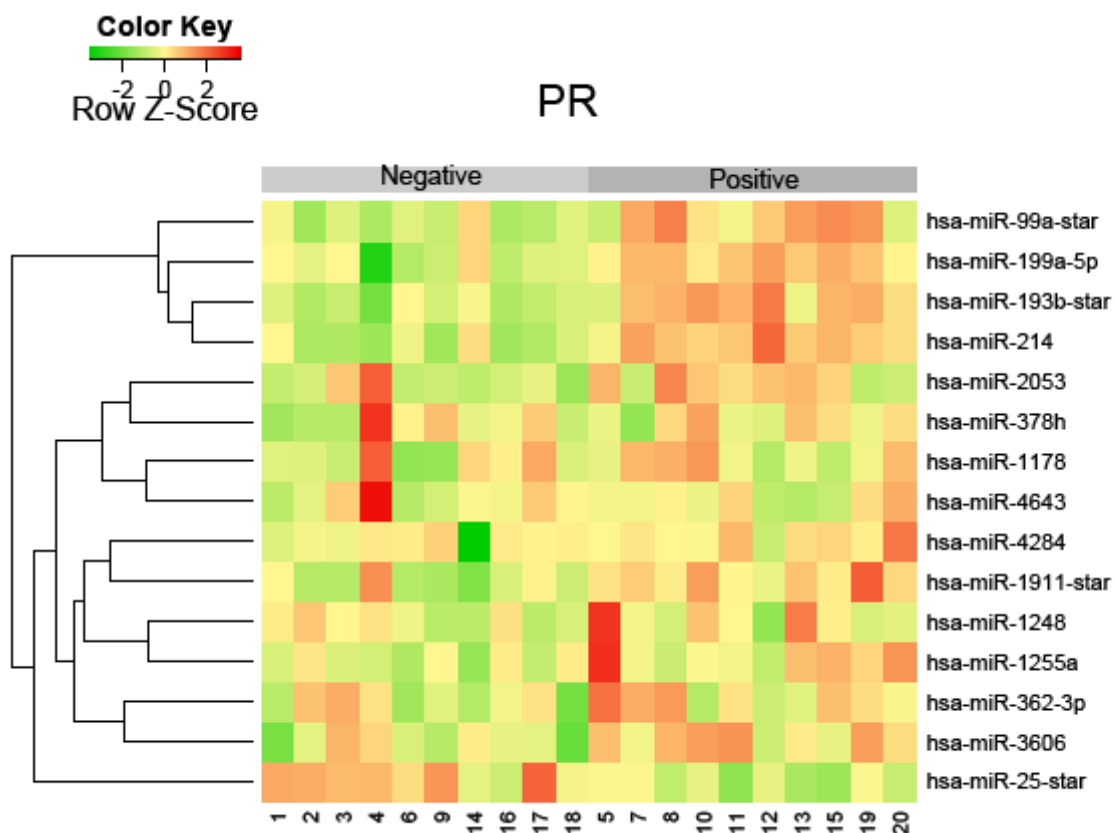

**Online Resource 4: Cluster analysis Progesterone Receptors (PR Negative/Positive) expression.**

Numbers at the base of the image correspond to the identification of patients: 1-5 *BRCA1* mutation carrier; 6-10 *BRCA2* mutation carrier; 11-15 BRCAX; 16-20 SBC.

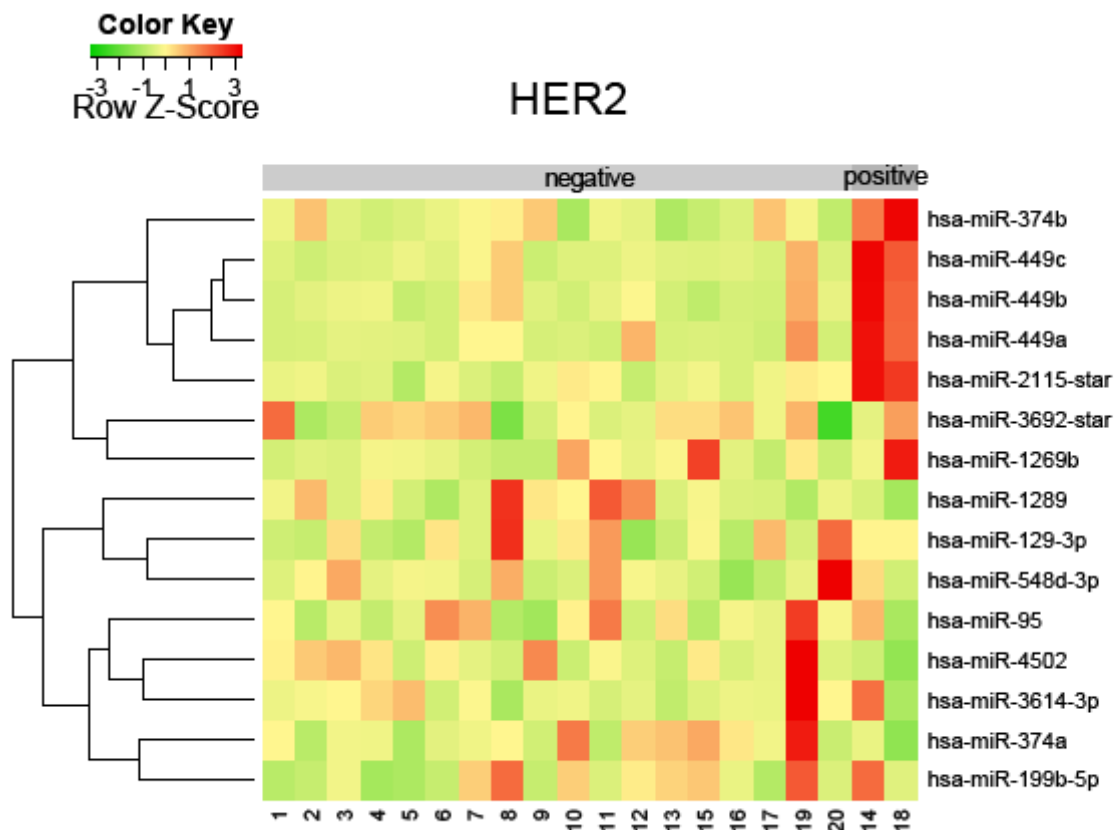

**Online Resource 5: Cluster analysis HER2 (Negative/Positive) expression.**

Numbers at the base of the image correspond to the identification of patients: 1-5 *BRCA1* mutation carrier; 6-10 *BRCA2* mutation carrier; 11-15 BRCAx; 16-20 SBC.

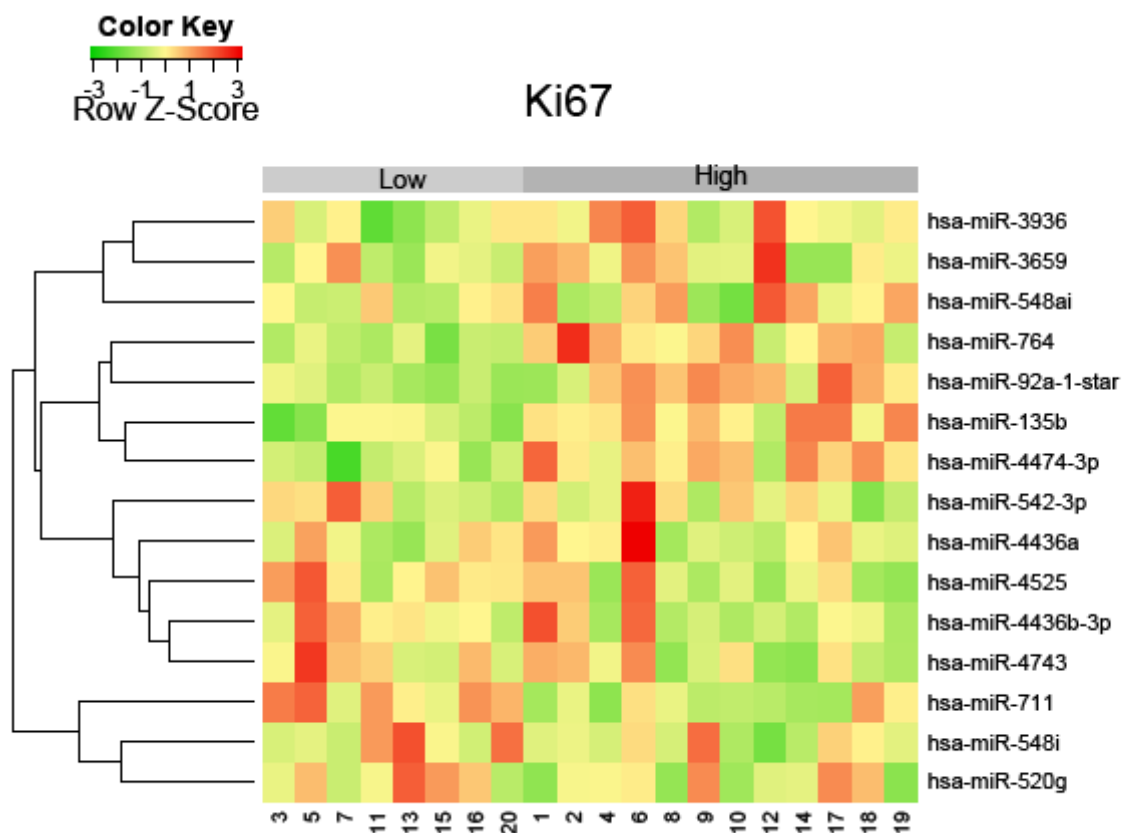

**Online Resource 6: Cluster analysis Ki67 (Low/High) expression.**

Numbers at the base of the image correspond to the identification of patients: 1-5 *BRCA1* mutation carrier; 6-10 *BRCA2* mutation carrier; 11-15 BRCAx; 16-20 SBC.

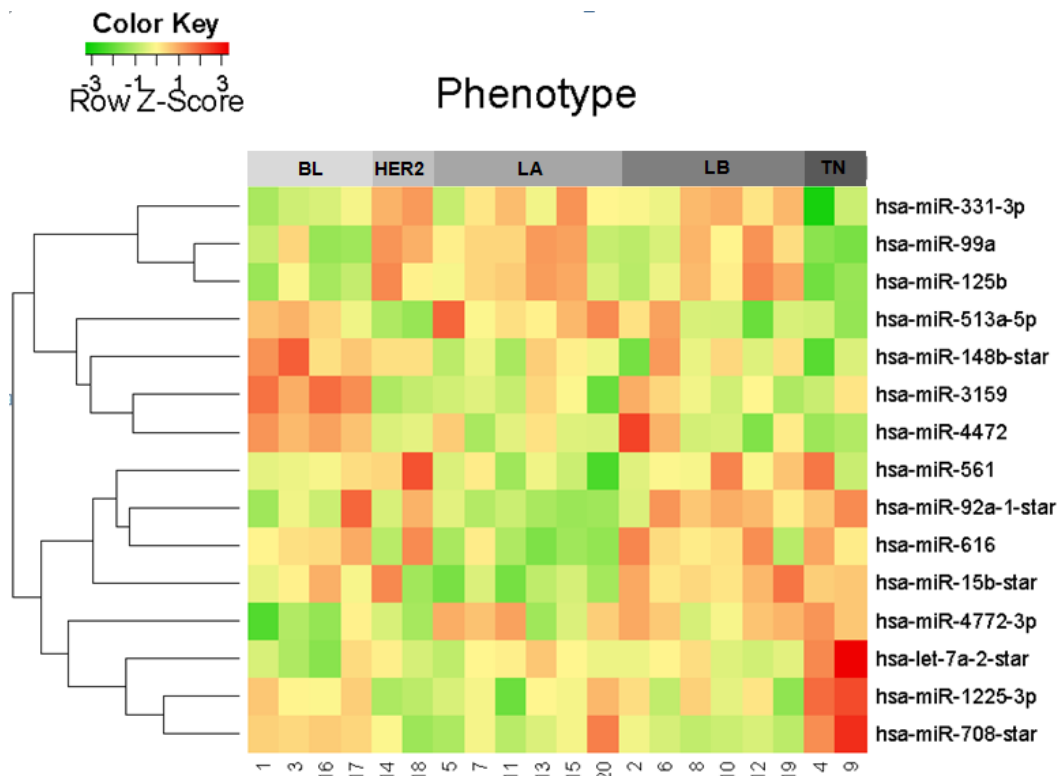

**Online Resource 7: Cluster analysis immune-phenotype.**

BL: Basal; HER2: HER2 classic; LA: Luminal A; LB: Luminal B; TN: Triple negative

Numbers at the base of the image correspond to the identification of patients: 1-5 *BRCA1* mutation carrier; 6-10 *BRCA2* mutation carrier; 11-15 BRCAX; 16-20 SBC.

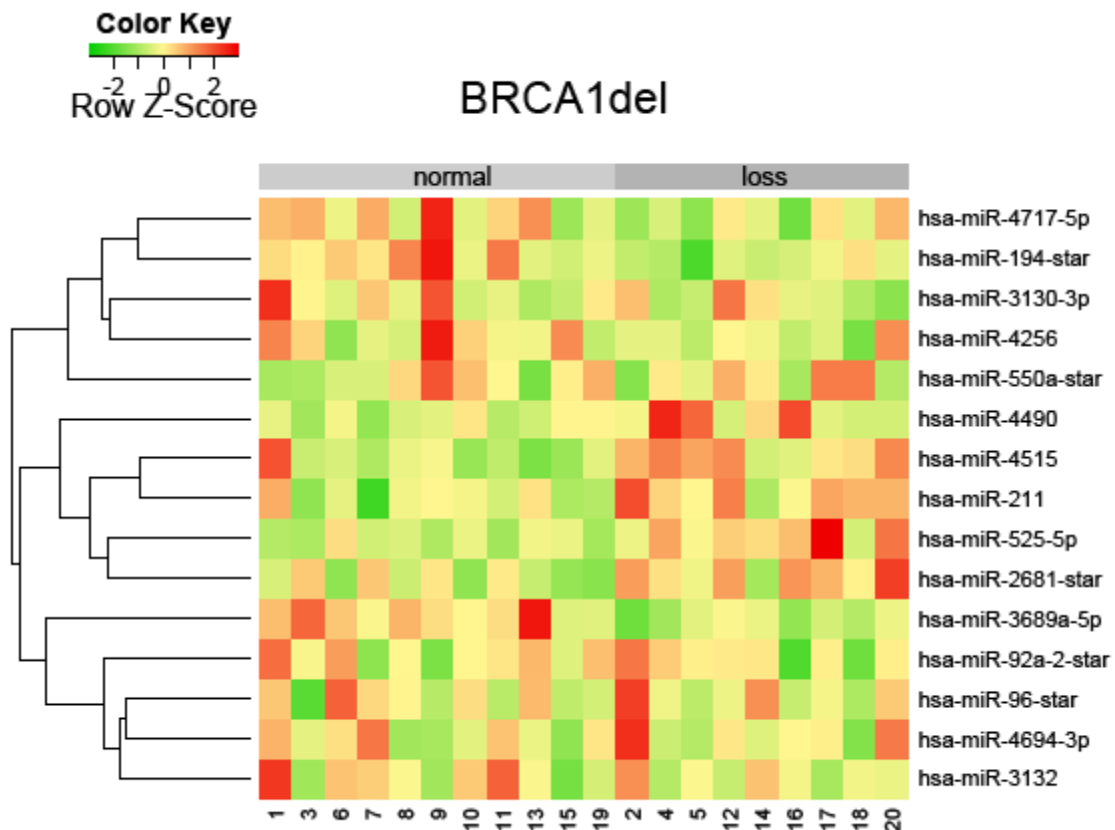

**Online Resource 8: Cluster analysis *BRCA1* deletions (Normal/Loss).**

Numbers at the base of the image correspond to the identification of patients: 1-5 *BRCA1* mutation carrier; 6-10 *BRCA2* mutation carrier; 11-15 BRCAX; 16-20 SBC.

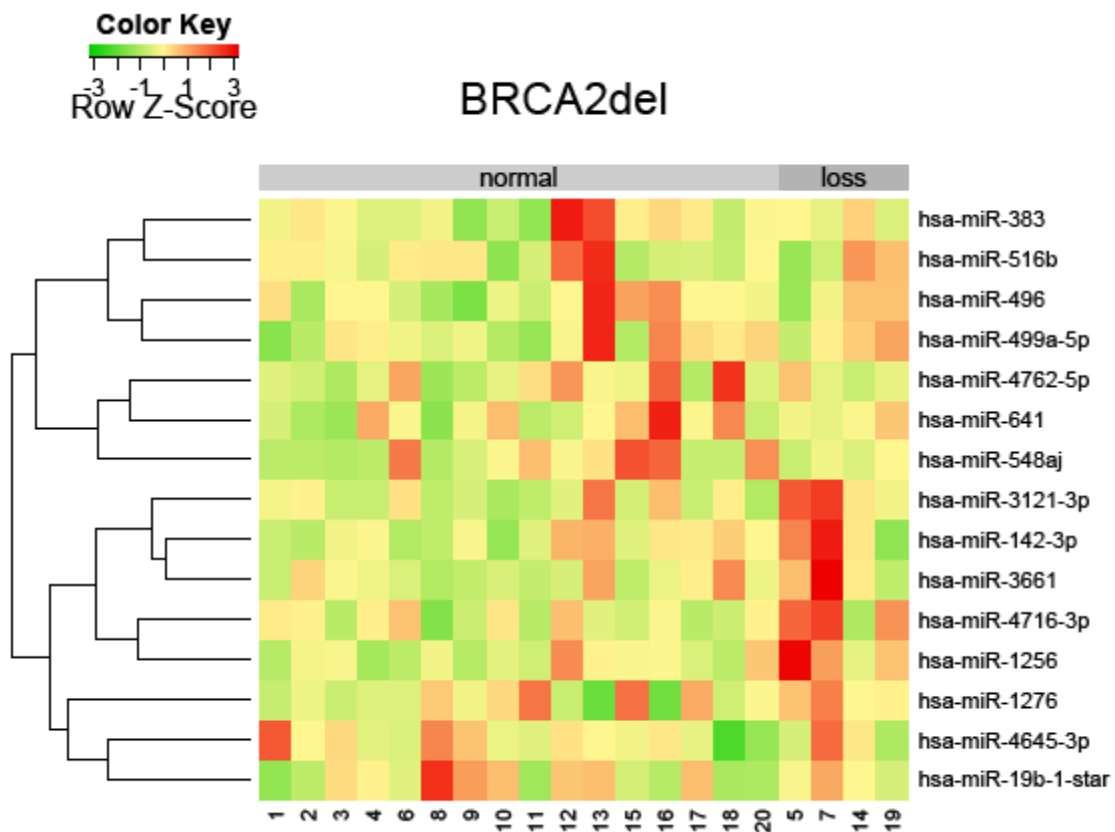

**Online Resource 9: Cluster analysis *BRCA2* deletions (Normal/Loss).**

Numbers at the base of the image correspond to the identification of patients: 1-5 *BRCA1* mutation carrier; 6-10 *BRCA2* mutation carrier; 11-15 BRCAX; 16-20 SBC.

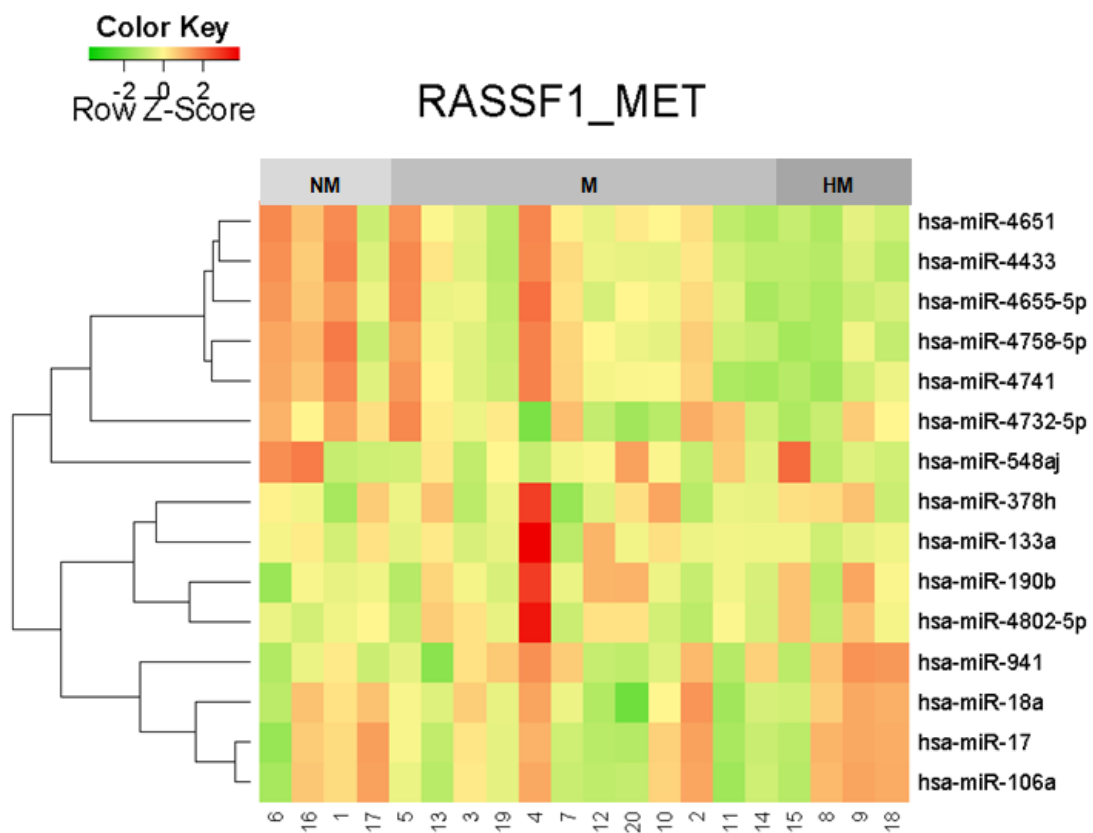

**Online Resource 10: Cluster Analysis *RASSF1* promoter methylation.**

NM: Non methylated; M: Methylated; HM: Highly methylated. Numbers at the base of the image correspond to the identification of patients: 1-5 *BRCA1* mutation carrier; 6-10 *BRCA2* mutation carrier; 11-15 BRCAX; 16-20 SBC.

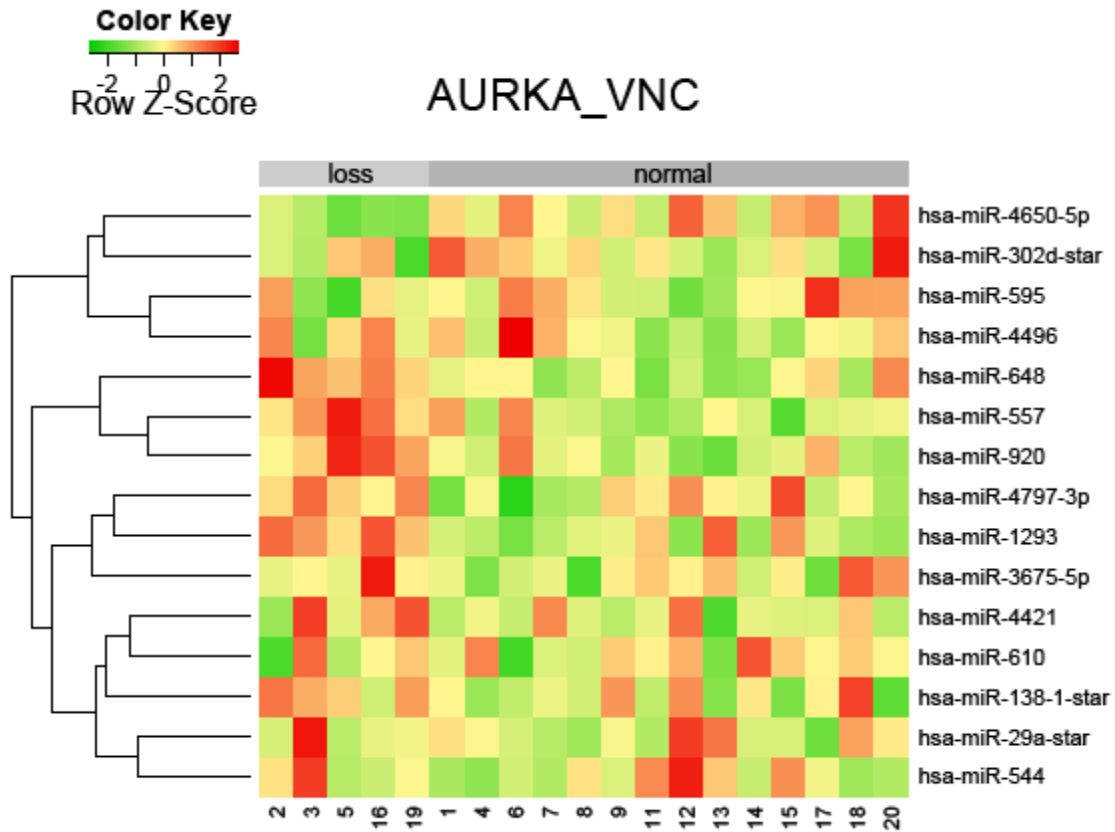

**Online Resource 11: Cluster analysis *AURKA* copy number variations (Loss/Normal).**

Numbers at the base of the image correspond to the identification of patients: 1-5 *BRCA1* mutation carrier; 6-10 *BRCA2* mutation carrier; 11-15 BRCAX; 16-20 SBC.
